# Supplementary material for: A unified multi-kingdom Golden Gate cloning platform
Source: PubMed Central journal article supplement (PMC6626145; doi:10.1038/s41598-019-46171-2), 2019-07-12
Supplement: 41598_2019_46171_MOESM1_ESM.pdf [file 41598_2019_46171_MOESM1_ESM.pdf]

## **Supplementary Information**

### **A unified multi-kingdom Golden Gate cloning platform**

David Chiasson, Victor Giménez-Oya, Martin Bircheneder, Sabine Bachmaier, Tanja Studtrucker, Joel Ryan, Katharina Sollweck, Heinrich Leonhardt, Michael Boshart, Petra Dietrich, Martin Parniske

**A****MK System Restriction Enzymes**

**Bsal** GGTCTCN|XXXX  
CCAGAGN|XXXX

**Bpil** GAAGACNN|XXXX  
CTTCTGNN|XXXX

**Esp3I** CGTCTCN|XXXX  
GCAGAGN|XXXX

**B****Bpil Cloning Primer Templates**

**Bpil** **Bsal**

A-B F ATGAAGACTTTTACGGGTCTCAGCGG  
A-B R ATGAAGACTTCAGAGGTCTCACAGA

B-C F ATGAAGACTTTACGGGTCTCATCTGaacaATG (Kozak + Start)  
B-C R ATGAAGACTTCAGAGGTCTCAGGTGcc (cc for Glycine)

C-D F ATGAAGACTTTACGGGTCTCACCCATG (Start)  
C-D R ATGAAGACTTCAGAGGTCTCACCTT (No Stop)

D-E F ATGAAGACTTTTACGGGTCTCAAAGGga (ga for Glycine)  
D-E R ATGAAGACTTCAGAGGTCTCAGATT TTA (Stop)

E-F F ATGAAGACTTTTACGGGTCTCAAATC  
E-F R ATGAAGACTTCAGAGGTCTCACTCA

F-G F ATGAAGACTTTTACGGGTCTCATGAG  
F-G R ATGAAGACTTCAGAGGTCTCAGACA

↑ LI overhang      ↑ LII overhang

**C****Esp3I Cloning Primer Templates**

**Esp3I** **Bsal**

A-B F ATCGTCTCTTACGGGTCTCAGCGG  
A-B R ATCGTCTCTCAGAGGTCTCACAGA

B-C F ATCGTCTCTTACGGGTCTCATCTGaacaATG  
B-C R ATCGTCTCTCAGAGGTCTCAGGTGcc

C-D F ATCGTCTCTTACGGGTCTCACCCATG  
C-D R ATCGTCTCTCAGAGGTCTCACCTT (No Stop)

D-E F ATCGTCTCTTACGGGTCTCAAAGGga  
D-E R ATCGTCTCTCAGAGGTCTCAGATT TTA(Stop)

E-F F ATCGTCTCTTACGGGTCTCAAATC  
E-F R ATCGTCTCTCAGAGGTCTCACTCA

F-G F ATCGTCTCTTACGGGTCTCATGAG  
F-G R ATCGTCTCTCAGAGGTCTCAGACA

↑ LI overhang      ↑ LII overhang

**D****Blunt Cloning Primer Templates**

**Bsal**

A-B F ATGGTCTCAGCGG  
A-B R ATGGTCTCACAGA

B-C F ATGGTCTCATCTGaacaATG  
B-C R ATGGTCTCAGGTGcc

C-D F ATGGTCTCACCCATG  
C-D R ATGGTCTCACCTT (No Stop)

D-E F ATGGTCTCAAAGGga  
D-E R ATGGTCTCAGATT TTA(Stop)

E-F F ATGGTCTCAAATC  
E-F R ATGGTCTCACTCA

F-G F ATGGTCTCATGAG  
F-G R ATGGTCTCAGACA

↑ LII overhang

**Supplemental Figure 1. Primer design for entry cloning.** (A) Overview of the enzymes used in the MK system showing their recognition sites and cutting properties. All enzymes cut outside of their recognition site to generate a 4 bp staggered overhang. 'X' in the overhang denotes any nucleotide which can be custom designed. When amplifying a DNA part for LI cloning, primer templates for Bpil (B), Esp3I (C), and blunt cloning (D) are added to the 5' end of each primer. The indicated LI overhang is for sticky, directional cloning, while the LII overhang delineates the part position. A eukaryotic Kozak sequence (AACA) is added 5' to B-C parts. The stop codon for a C-D part is removed and is added 3' of D-E parts. Two nucleotides must be added to the B-C R and D-E F primers to maintain the reading frame when making protein fusions (encode for glycine residues).

**A****LI Cloning Workflow**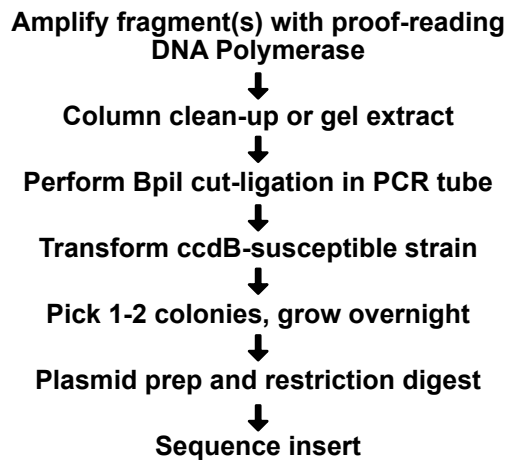**B****LII/LIII Cloning Workflow**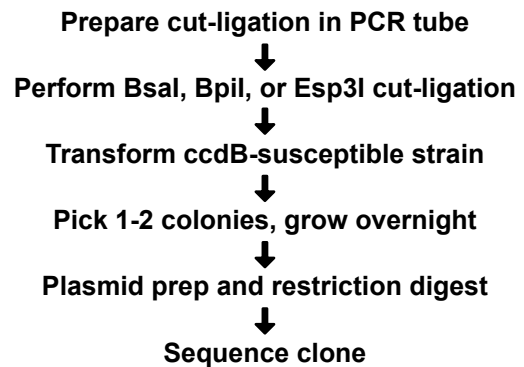**C**

| <b>Bpil Cut-Ligation Protocol</b>                 |                | <b>Bsal Cut-Ligation Protocol</b>                 |                | <b>Esp3I Cut-Ligation Protocol</b>                |                |
|---------------------------------------------------|----------------|---------------------------------------------------|----------------|---------------------------------------------------|----------------|
| Backbone (100ng/μl)                               | 1.0 μl         | Backbone (100ng/μl)                               | 1.0 μl         | Backbone (100ng/μl)                               | 1.0 μl         |
| Insert(s) (100 ng/μl)                             | 1.0 μl         | Insert(s) (100 ng/μl)                             | 1.0 μl         | Insert(s) (100 ng/μl)                             | 1.0 μl         |
| 10x Buffer G                                      | 1.5 μl         | 10x CutSmart Buffer                               | 1.5 μl         | 10x Tango Buffer                                  | 1.5 μl         |
| 10 mM ATP                                         | 1.5 μl         | 10 mM ATP                                         | 1.5 μl         | 10 mM ATP                                         | 1.5 μl         |
| Bpil                                              | 0.75 μl        | Bsal                                              | 0.75 μl        | Esp3I                                             | 0.75 μl        |
| T4 Ligase                                         | 0.75 μl        | T4 Ligase                                         | 0.75 μl        | T4 Ligase                                         | 0.75 μl        |
| H <sub>2</sub> O                                  |                | H <sub>2</sub> O                                  |                | H <sub>2</sub> O                                  |                |
| <b>Total</b>                                      | <b>15.0 μl</b> | <b>Total</b>                                      | <b>15.0 μl</b> | <b>Total</b>                                      | <b>15.0 μl</b> |
| 37°C for 10 min<br>16°C for 10 min ] x 6-8 cycles |                | 37°C for 10 min<br>16°C for 10 min ] x 6-8 cycles |                | 37°C for 10 min<br>16°C for 10 min ] x 6-8 cycles |                |
| 37°C for 10 min<br>65°C for 20 min<br>10°C hold   |                | 37°C for 10 min<br>65°C for 20 min<br>10°C hold   |                | 37°C for 10 min<br>65°C for 20 min<br>10°C hold   |                |
| Transform 5 μl into <i>E. coli</i>                |                | Transform 5 μl into <i>E. coli</i>                |                | Transform 5 μl into <i>E. coli</i>                |                |

**Supplemental Figure 2. Workflow and protocols for cloning.** Shown are the standard workflows for (A) LI and (B) LII/LIII cloning. (C) Protocols for performing cut-ligations with Bpil (Thermo Fisher Scientific), Bsal-HF (New England Biolabs), and Esp3I (Thermo Fisher Scientific) enzymes. By default, all backbone and entry plasmids are diluted to 100 ng/μl and 100 ng of each is used per cut-ligation. If the efficiency is low, the backbone can be kept at 100 ng while adding a molar ratio of 2:1 (part:backbone) of each insert. Cut-ligations are performed in a thermocycler for 6-8 cycles.

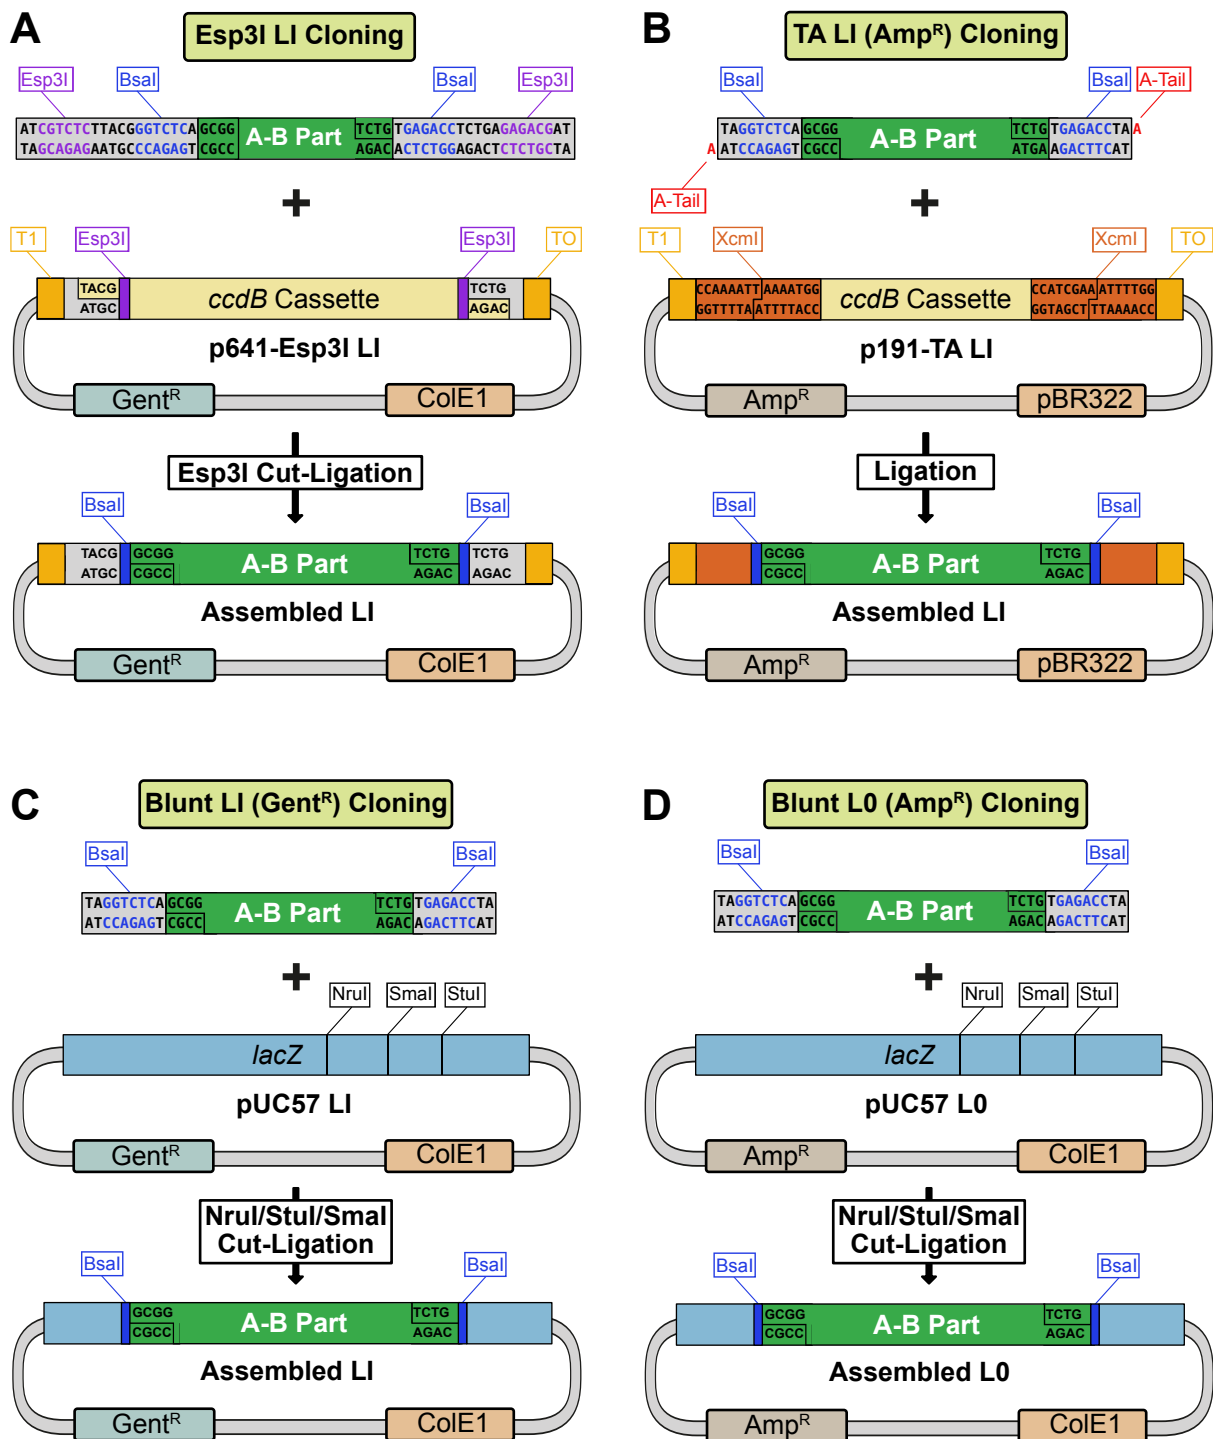

**Supplemental Figure 3. Alternative LI entry cloning strategies.** (A) If a part contains numerous *BpiI* sites and no (or few) *Esp3I* sites, it can be cloned into p641-Esp3I by *Esp3I* cut-ligation. To avoid performing mutagenesis, TA (B) or blunt cloning (C, D) can be utilized. (B) The p191-TA LI backbone is prepared by digesting with *XcmI* to generate 5' T overhangs and gel purified. A 3' A nucleotide can be added to blunt PCR products by Taq Polymerase in the presence of dATP. A standard ligation is then performed. Blunt cloning (*NruI*, *SmaI*, or *StuI* enzymes) in combination with blue-white screening can be performed with a modified pUC57 backbone which is either gentamycin (C) or ampicillin (D) resistant.

## LIII Backbones

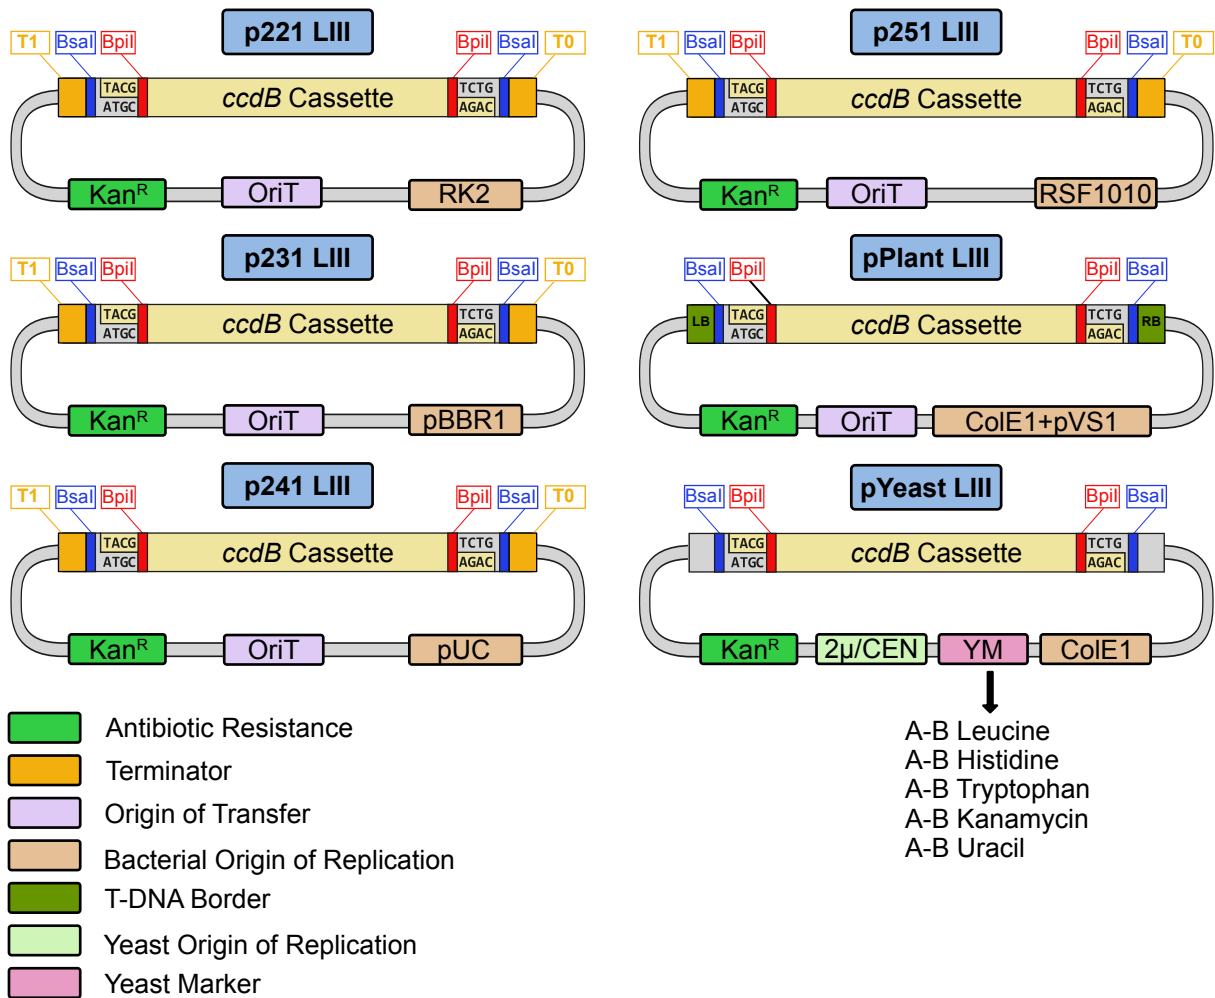

**Supplemental Figure 4. MK system backbones for LIII cloning.** LIII (A-B position) plasmid backbones are identical to LII backbones except for the kanamycin resistance cassette and reversed orientation of the BsaI and BpiI sites. Bacterial plasmids contain an origin of transfer (OriT) and flanking terminators (T1, T0). Plant backbones contain a double origin of replication for *E. coli* and *Agrobacterium* along with an OriT and T-DNA borders for genomic integration. Yeast backbones contain an additional yeast origin of replication (high copy 2μ or low copy CEN/ARS) along with an auxotrophic or dominant marker.

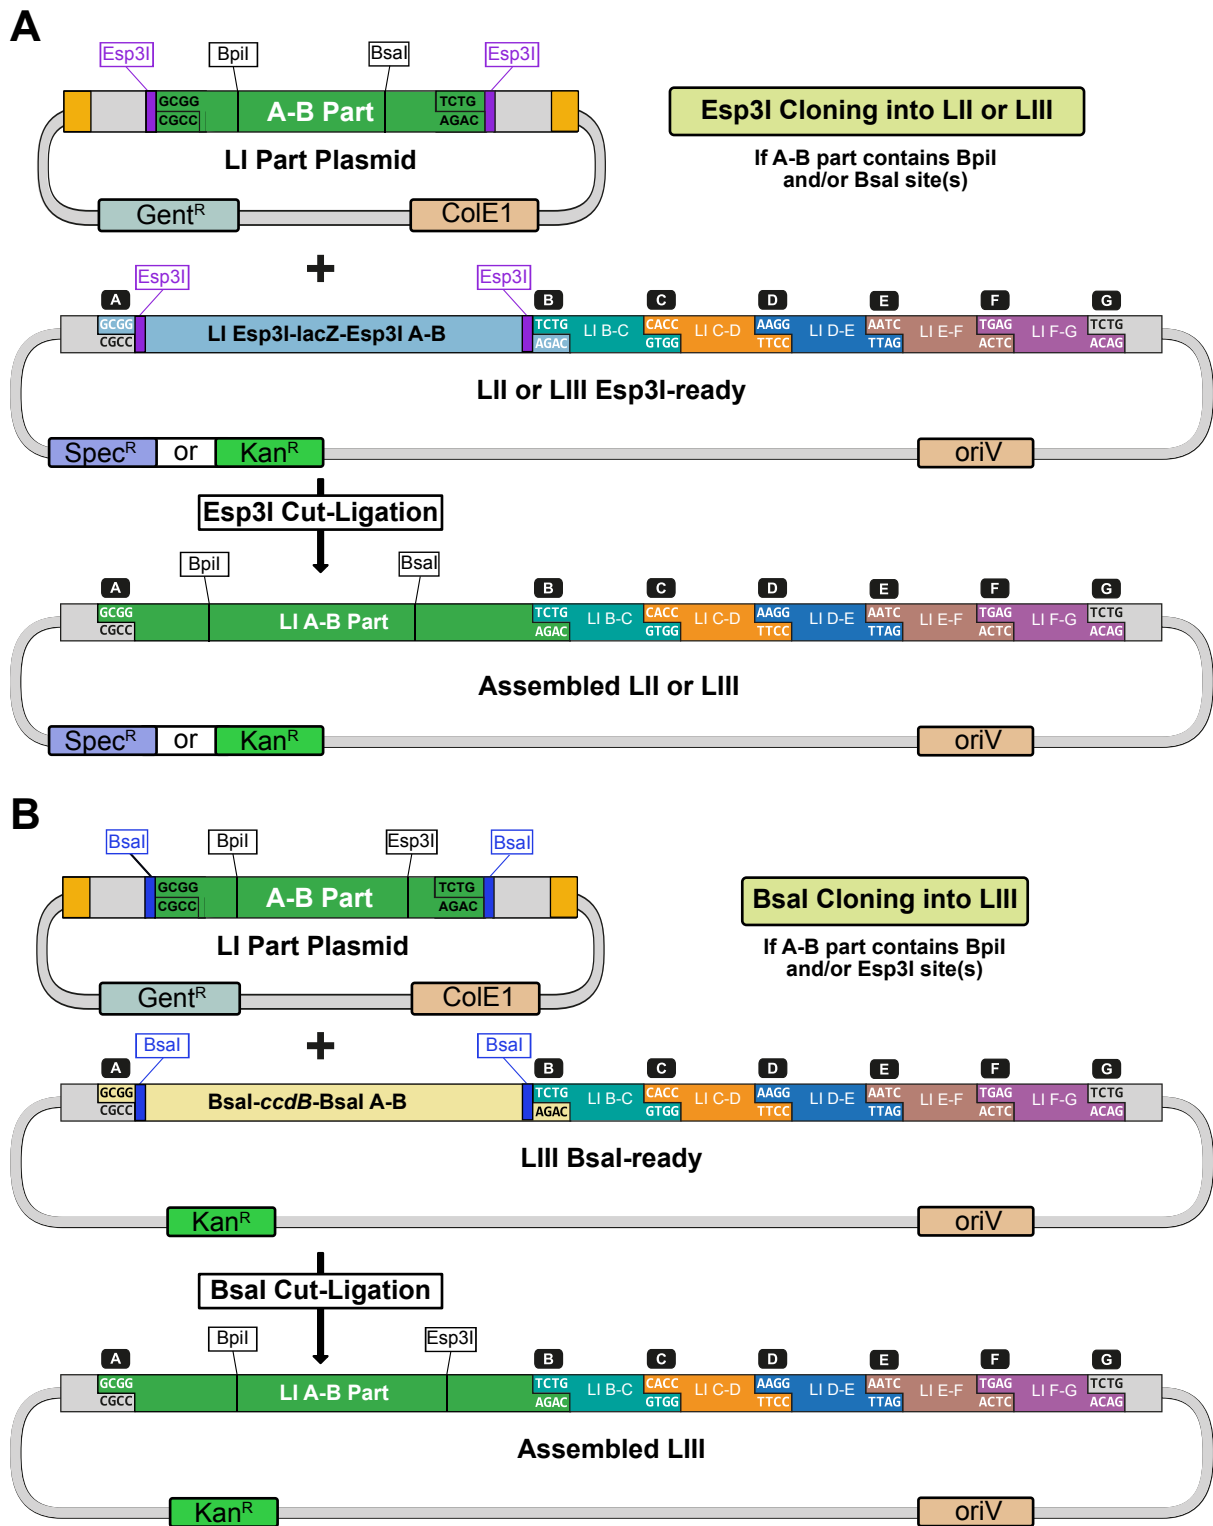

**Supplemental Figure 5. Alternative cloning strategies for parts with sensitive Bsal, Bpil, or Esp3I sites.** (A) For bypassing Bsal or Bpil cut-ligations with sensitive A-B parts containing Bsal or Bpil sites, the LI Esp3I-lacZ-Esp3I A-B DMY is cloned into a LII in place of an A-B promoter (C-D lacZ DMY also available). The A-B part is cloned with flanking Esp3I sites, and sub-cloned into either the LII or LIII plasmid containing the A-B lacZ DMY by Esp3I cut-ligation (blue-white selection). (B) If the A-B part contains sensitive Bpil or Esp3I restriction sites, a Bsal-*ccdB*-Bsal A-B DMY is can be inserted by Esp3I cut-ligation to replace the Esp3I-lacZ-Esp3I A-B DMY. The A-B promoter part can then be sub-cloned from LI directly to LIII by Bsal cut-ligation (*ccdB* negative selection).

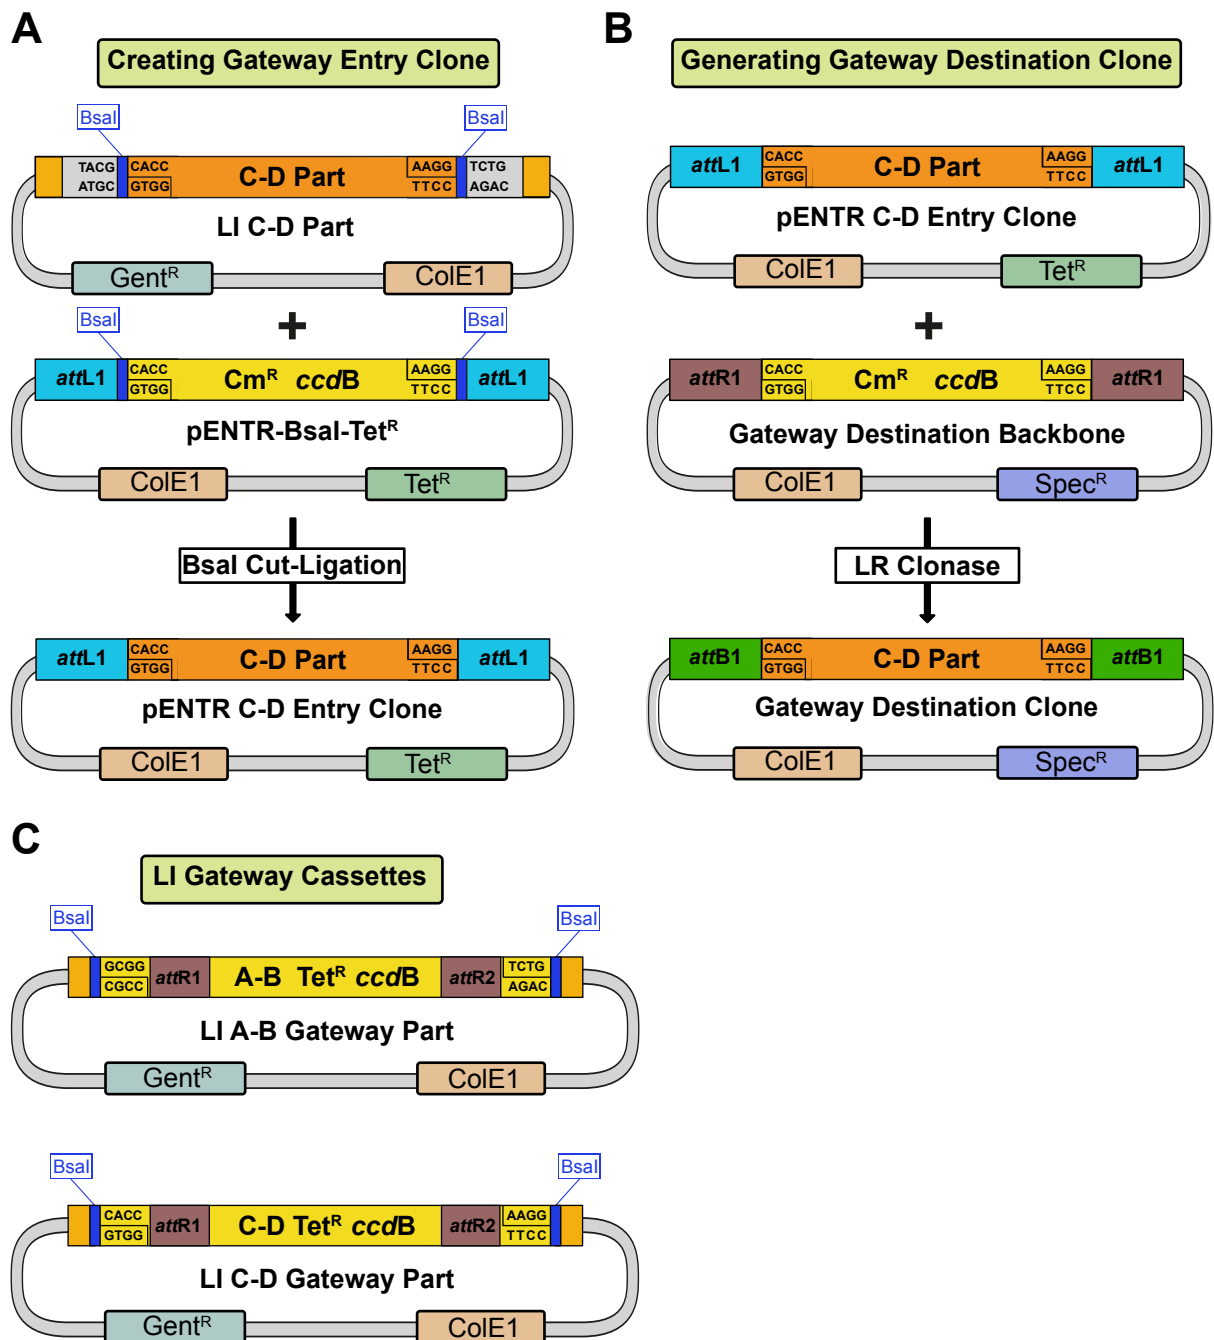

**Supplemental Figure 6. Creating Gateway cloning entry and destination plasmids.** (A) Gateway entry clones can be generated by sub-cloning LI C-D parts (or directly ligating a PCR product) into pENTR-Bsa-Tet. (B) A pENTR C-D entry clone is then mixed with a standard Gateway destination backbone and an LR clonase enzyme mix to generate a Gateway destination clone. (C) Custom Gateway destination backbones can also be created by Golden Gate cloning. LI A-B or C-D Gateway parts with flanking attR sites are available for cloning into a LII backbone by Bsal cut-ligation.

**A****U6-26 Pro F**

ATGAAGACTTTACGGTCTCAGCGGTCTGTTGAACAACGGAAACTCG

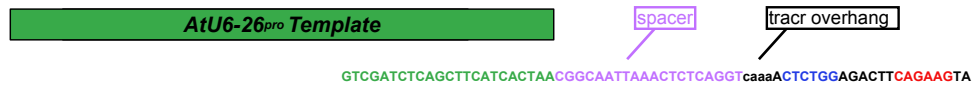**B**

| Primer Template ( <b>Bpil</b> + <b>Bsal</b> ) | Target Sequence (PDS) | U6 Promoter Template    |
|-----------------------------------------------|-----------------------|-------------------------|
| AATGAAGACTTCAGAGGGTCTCAaaac                   | GCCGTTAATTTGAGAGTCCA  | aatcactacttcgactctagctg |

PDS gRNA R

**Design Reverse Spacer Primer****Step 1.** Copy primer template**Step 2.** Reverse complement **Target Sequence (PDS)** and add to primer template**Step 3.** Add **U6-26 promoter template** sequence

1. ATGAAGACTTCAGAGGGTCTCAaaac

2. ATGAAGACTTCAGAGGGTCTCAaaacTGGACTCTCAAATTAACGGC

3. ATGAAGACTTCAGAGGGTCTCAaaacTGGACTCTCAAATTAACGGCaatcactacttcgactctagctg

Step 4. Amplify AtU6-26 template, clone into LI

Step 5. Combine into LII with tracr-U6-1<sup>term</sup> + F-G DMY**C**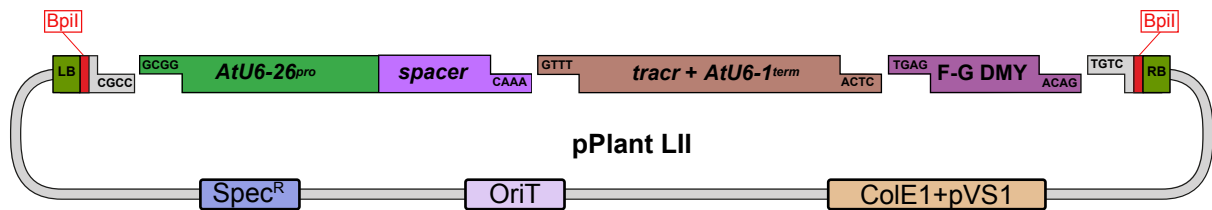

**Supplemental Figure 7. CRISPR spacer cloning strategy.** (A) Overview of the strategy to generate a fusion of the *AtU6-26* (example) promoter and a spacer (target) sequence. The *AtU6-26* promoter is used as a template for PCR in order to add the required flanking sequences. (B) Reverse primer design steps to generate a primer that binds to the *AtU6-26* promoter and adds the required spacer sequence. (C) The LI *AtU6-26* promoter-spacer fusion is combined with a LI tracr-U6-1 terminator and an F-G DMY in a *Bsal* cut-ligation to generate a LII plasmid.



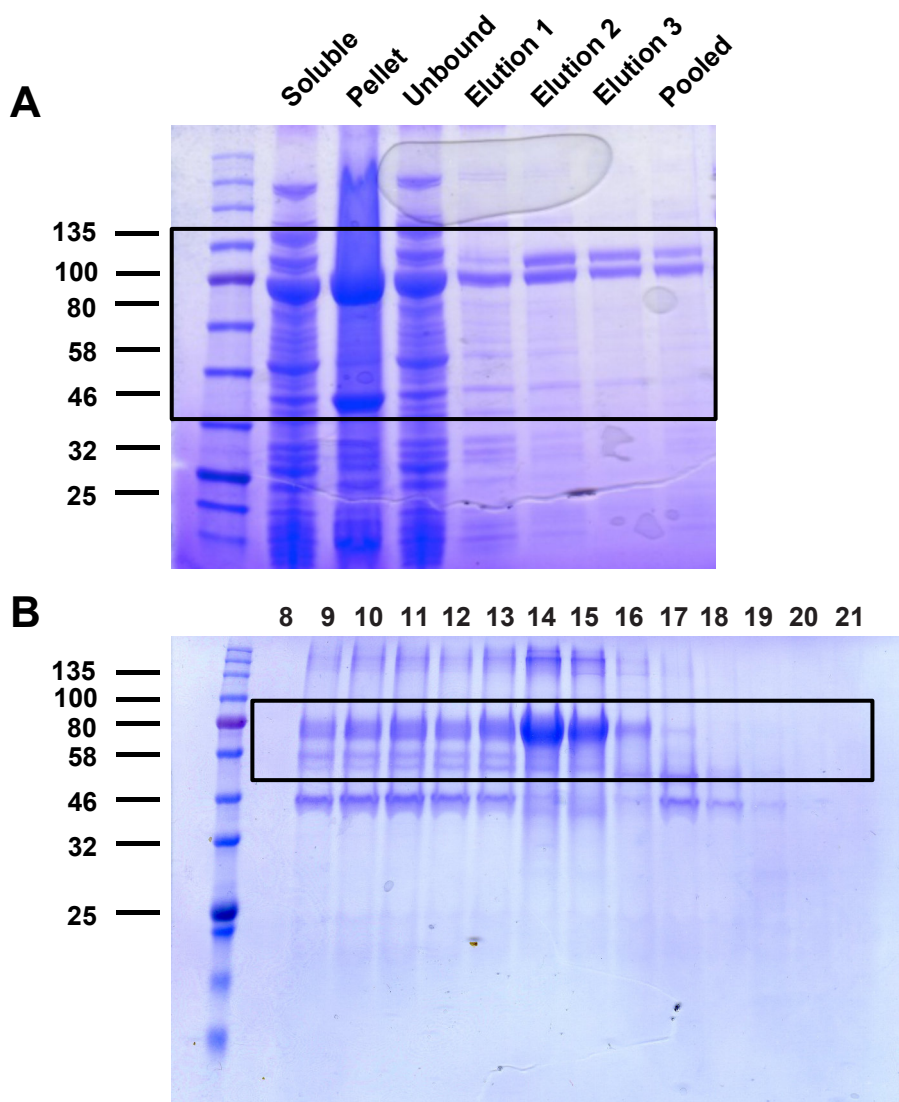

**Supplemental Figure 8. Original SDS-PAGE gel images.** **A.** SDS-PAGE separation of StrepII-SUMO-CYCLOPS and His-SUMO-CCaMK proteins after co-expression and purification by StrepII affinity chromatography. **B.** SDS-PAGE separation of StrepII-SUMO-CYCLOPS and His-SUMO-CCaMK protein complex after size exclusion gel chromatography. Molecular weight standards are shown on the left side of both gel images. Black boxes indicate cropped regions chosen for Figure 5.

**Supplementary Table 1. Golden Gate backbones used in this study**

| Backbone       | Level   | Origin of Replication | Bacterial Resistance | Based Upon   | Source                        |
|----------------|---------|-----------------------|----------------------|--------------|-------------------------------|
| p641-Bpil      | I       | ColE1                 | Gentamicin           | pSEVA641     | SEVA Collection <sup>29</sup> |
| p641-Esp3l     | I       | ColE1                 | Gentamicin           | pSEVA641     | SEVA Collection <sup>29</sup> |
| p191-TA        | I       | pMB1/Rop              | Ampicillin           | pSEVA191     | SEVA Collection <sup>29</sup> |
| pUC57 LI       | I       | pUC                   | Gentamicin           | pUC57        | Binder et al <sup>10</sup>    |
| pUC57 L0       | 0       | pUC                   | Ampicillin           | pUC57        | Binder et al <sup>10</sup>    |
| pENTR-Bsal-Tet | Gateway | ColE1                 | Tetracycline         | pENTR/D-TOPO | Binder et al <sup>10</sup>    |
| p421 F1-2      | II      | RK2                   | Spectinomycin        | pSEVA421     | SEVA Collection <sup>29</sup> |
| p421 F2-3      | II      | RK2                   | Spectinomycin        | pSEVA421     | SEVA Collection <sup>29</sup> |
| p421 F3-4      | II      | RK2                   | Spectinomycin        | pSEVA421     | SEVA Collection <sup>29</sup> |
| p421 F4-5      | II      | RK2                   | Spectinomycin        | pSEVA421     | SEVA Collection <sup>29</sup> |
| p421 F5-6      | II      | RK2                   | Spectinomycin        | pSEVA421     | SEVA Collection <sup>29</sup> |
| p221 A-B       | III     | RK2                   | Kanamycin            | pSEVA221     | SEVA Collection <sup>29</sup> |
| p431 F1-2      | II      | pBBR1                 | Spectinomycin        | pSEVA431     | SEVA Collection <sup>29</sup> |
| p431 F2-3      | II      | pBBR1                 | Spectinomycin        | pSEVA431     | SEVA Collection <sup>29</sup> |
| p431 F3-4      | II      | pBBR1                 | Spectinomycin        | pSEVA431     | SEVA Collection <sup>29</sup> |
| p431 F4-5      | II      | pBBR1                 | Spectinomycin        | pSEVA431     | SEVA Collection <sup>29</sup> |
| p431 F5-6      | II      | pBBR1                 | Spectinomycin        | pSEVA431     | SEVA Collection <sup>29</sup> |
| p231 A-B       | III     | pBBR1                 | Kanamycin            | pSEVA231     | SEVA Collection <sup>29</sup> |
| p441 F1-2      | II      | ColE1                 | Spectinomycin        | pSEVA441     | SEVA Collection <sup>29</sup> |
| p441 F2-3      | II      | ColE1                 | Spectinomycin        | pSEVA441     | SEVA Collection <sup>29</sup> |
| p441 F3-4      | II      | ColE1                 | Spectinomycin        | pSEVA441     | SEVA Collection <sup>29</sup> |
| p441 F4-5      | II      | ColE1                 | Spectinomycin        | pSEVA441     | SEVA Collection <sup>29</sup> |
| p441 F5-6      | II      | ColE1                 | Spectinomycin        | pSEVA441     | SEVA Collection <sup>29</sup> |
| p241 A-B       | III     | ColE1                 | Kanamycin            | pSEVA241     | SEVA Collection <sup>29</sup> |
| p451 F1-2      | II      | RSF 1010              | Spectinomycin        | pSEVA451     | SEVA Collection <sup>29</sup> |
| p451 F2-3      | II      | RSF 1010              | Spectinomycin        | pSEVA451     | SEVA Collection <sup>29</sup> |
| p451 F3-4      | II      | RSF 1010              | Spectinomycin        | pSEVA451     | SEVA Collection <sup>29</sup> |
| p451 F4-5      | II      | RSF 1010              | Spectinomycin        | pSEVA451     | SEVA Collection <sup>29</sup> |
| p451 F5-6      | II      | RSF 1010              | Spectinomycin        | pSEVA451     | SEVA Collection <sup>29</sup> |
| p251 A-B       | III     | RSF 1010              | Kanamycin            | pSEVA251     | SEVA Collection <sup>29</sup> |
| pPlant F1-2    | II      | ColE1 + pVS1          | Spectinomycin        | LIIβ F1-2    | Binder et al <sup>10</sup>    |
| pPlant F2-3    | II      | ColE1 + pVS1          | Spectinomycin        | LIIβ F2-3    | Binder et al <sup>10</sup>    |
| pPlant F3-4    | II      | ColE1 + pVS1          | Spectinomycin        | LIIβ F3-4    | Binder et al <sup>10</sup>    |
| pPlant F4-5    | II      | ColE1 + pVS1          | Spectinomycin        | LIIβ F4-5    | Binder et al <sup>10</sup>    |
| pPlant F5-6    | II      | ColE1 + pVS1          | Spectinomycin        | LIIβ F5-6    | Binder et al <sup>10</sup>    |
| pPlant A-B     | III     | ColE1 + pVS1          | Kanamycin            | LIIIβ A-B    | Binder et al <sup>10</sup>    |

| Backbone        | Level | Origin of Replication | Yeast Marker | Bacterial Resistance | Based Upon   | Source                  |
|-----------------|-------|-----------------------|--------------|----------------------|--------------|-------------------------|
| pYeast 2μ F1-2  | II    | ColE1                 | Leucine      | Spectinomycin        | Custom Built | Lee et al <sup>23</sup> |
| pYeast 2μ F2-3  | II    | ColE1                 | Histidine    | Spectinomycin        | Custom Built | Lee et al <sup>23</sup> |
| pYeast 2μ F3-4  | II    | ColE1                 | Tryptophan   | Spectinomycin        | Custom Built | Lee et al <sup>23</sup> |
| pYeast 2μ F4-5  | II    | ColE1                 | Kanamycin    | Spectinomycin        | Custom Built | Lee et al <sup>23</sup> |
| pYeast 2μ F5-6  | II    | ColE1                 | Uracil       | Spectinomycin        | Custom Built | Lee et al <sup>23</sup> |
| pYeast CEN F1-2 | II    | ColE1                 | Leucine      | Spectinomycin        | Custom Built | Lee et al <sup>23</sup> |
| pYeast CEN F2-3 | II    | ColE1                 | Histidine    | Spectinomycin        | Custom Built | Lee et al <sup>23</sup> |
| pYeast CEN F3-4 | II    | ColE1                 | Tryptophan   | Spectinomycin        | Custom Built | Lee et al <sup>23</sup> |
| pYeast CEN F4-5 | II    | ColE1                 | Kanamycin    | Spectinomycin        | Custom Built | Lee et al <sup>23</sup> |
| pYeast CEN F5-6 | II    | ColE1                 | Uracil       | Spectinomycin        | Custom Built | Lee et al <sup>23</sup> |
| pYeast LEU A-B  | III   | ColE1                 | Leucine      | Kanamycin            | Custom Built | Lee et al <sup>23</sup> |
| pYeast HIS A-B  | III   | ColE1                 | Histidine    | Kanamycin            | Custom Built | Lee et al <sup>23</sup> |
| pYeast TRP A-B  | III   | ColE1                 | Tryptophan   | Kanamycin            | Custom Built | Lee et al <sup>23</sup> |
| pYeast KAN A-B  | III   | ColE1                 | Kanamycin    | Kanamycin            | Custom Built | Lee et al <sup>23</sup> |
| pYeast URA A-B  | III   | ColE1                 | Uracil       | Kanamycin            | Custom Built | Lee et al <sup>23</sup> |

Supplementary Table 2. Golden Gate LII and LIII plasmids used in this study

|       | AB                      | BC              | CD               | DE           | EF                     | FG                     | Backbone              | Level        | Resistance        | Reference |
|-------|-------------------------|-----------------|------------------|--------------|------------------------|------------------------|-----------------------|--------------|-------------------|-----------|
| GGP1  | ELFalpa Pro             | mCherry G032    | BB7 C-D DMY      | BB8 D-E DMY  | SV40 Term              | SV40:Neomycin          | p441 F1-2             | II           | Spec              | Figure 4  |
| GGP2  | ELFalpa Pro             | NLS G61         | YFP              | BB8 D-E DMY  | SV40 Term              | SV40:Neomycin          | p441 F1-2             | II           | Spec              | Figure 4  |
| GGP3  | T7 β-globin 5'          | BB06 B-C DMY    | KAT1             | YFP G12      | β-globin 3'UTR AAA+CCC | BB09 F-G DMY           | p441 F1-2             | II           | Spec              | Figure 4  |
| GGP4  | T7 β-globin 5'          | BB06 B-C DMY    | KAT1             | YFP G12      | β-globin 3'UTR AAA     | BB09 F-G DMY           | p441 F1-2             | II           | Spec              | Figure 4  |
| GGP5  | T7 β-globin 5'          | BB06 B-C DMY    | KAT1             | YFP G12      | β-globin 3'UTR         | BB09 F-G DMY           | p441 F1-2             | II           | Spec              | Figure 4  |
| GGP6  | 35S Pro A-C             |                 | AteCas9 WT       | BB8-DE DMY   | G45 HSP T              | BB09 F-G DMY           | pPlant F2-3           | II           | Spec              | Figure 5  |
|       | <b>A-Custom</b>         | <b>Custom-F</b> |                  |              |                        | <b>FG</b>              | <b>Backbone</b>       |              | <b>Resistance</b> |           |
| GGP7  | AtUG-26 Pro:NbPDS1 gRNA | tracr:U6-1 term |                  |              |                        | BB09 F-G DMY           | pPlant F5-6           | II           | Spec              | Figure 5  |
| GGP8  | <b>AB</b>               | <b>BC</b>       | <b>CD</b>        | <b>DE</b>    | <b>EF</b>              | <b>FG</b>              | <b>Backbone</b>       | <b>Level</b> | <b>Resistance</b> |           |
| GGP9  | T7 lacO                 | HIS-SUMO        | CCaMK            | BB08 DMY     | T7 Terminator          | BB09 F-G DMY           | pSEVA431 1-2          | II           | Spec              | Figure 5  |
| GGP10 | T7 lacO                 | StrepII-SUMO    | CYCLOPS          | BB08 DMY     | T7 Terminator          | LacI                   | pSEVA431 3-4          | II           | Spec              | Figure 5  |
|       | <b>1-2</b>              | <b>2-3</b>      | <b>3-4</b>       | <b>4-5</b>   | <b>5-6</b>             |                        | <b>Backbone</b>       | <b>Level</b> | <b>Resistance</b> |           |
| GGP11 | GGP9                    | BB39 2-3 DMY    | GGP10            | BB40 4-5 DMY | BB65 5-6 DMY           |                        | p231 A-B              | III          | Kan               | Figure 5  |
|       | <b>AB</b>               | <b>BC</b>       | <b>CD</b>        | <b>DE</b>    | <b>EF</b>              | <b>FG</b>              | <b>Backbone</b>       | <b>Level</b> | <b>Resistance</b> |           |
| GGP12 | ADH Pro 400             | GAL4AD GGS B-C  | CYCLOPS          | BB08 DMY     | TDH1 Term              | BB09 FG DMY            | pYeast LII 2μ LEU 1-2 | II           | Spec              | Figure 6  |
| GGP13 | ADH Pro 400             | GAL4AD GGS B-C  | CYCLOPS (84-366) | BB08 DMY     | TDH1 Term              | BB09 FG DMY            | pYeast LII 2μ LEU 1-2 | II           | Spec              | Figure 6  |
| GGP14 | ADH Pro Truncated       | GAL4BD GGS B-C  | CCaMK C-D        | BB08 DMY     | ADH1 Term              | BB09 FG DMY            | pYeast LII 2μ TRP 3-4 | II           | Spec              | Figure 6  |
| GGP15 | ADH Pro Truncated       | GAL4BD GGS B-C  | p53 (72-390)     | BB08 DMY     | ADH1 Term              | BB09 FG DMY            | pYeast LII 2μ TRP 3-4 | II           | Spec              | Figure 6  |
| GGP16 | ADH Pro Full length     | GAL4AD GGS B-C  | SV40T (87-708)   | BB08 DMY     | ADH1 Term              | BB09 FG DMY            | pYeast LII 2μ LEU 1-2 | II           | Spec              | Figure 6  |
| GGP17 | 5'Homology PARP Pro     | BB06 B-C DMY    | PKAR             | mNeonGreen   | VSG poly A (PARP)      | Puromycin + 3'Homology | pLII-Amp F1-2 (BB30)  | II           | Amp               | Figure 6  |

**Supplementary Table 3. Primers used in this study for genome editing**

| <b>Name</b>  | <b>Sequence 5'-3'</b>                                               | <b>Purpose</b>                           |
|--------------|---------------------------------------------------------------------|------------------------------------------|
| U6-26 Pro F  | ATGAAGACTTTACGGGTCTCAGCGGTCGTTGAACAACGGAAACTCG                      | Cloning U6-26 Pro:PDS Spacer             |
| PDS Spacer R | ATGAAGACTTCAGAGGTCTCAaaacTGGACTCTCAAATTAACGGCaatcactactcgactctagctg | Cloning U6-26 Pro:PDS Spacer             |
| Myl Bsal F   | ATGGTCTCACCTTACATAACAAATTCCTTTGCAAGC                                | Cloning PDS target region into pENTR-Bsa |
| Myl Bsal R   | ATGGTCTCACCTTTTTAAAGGATTAAGTCCTTTGTCA                               | Cloning PDS target region into pENTR-Bsa |
